# Supplementary material
Source: publisher figshare collection journal article supplement (https://frontiersin.figshare.com/ndownloader/files/14274803)
Supplement: Supplementary file [file 14274803]

# The *Neisseria gonorrhoeae* methionine sulfoxide reductase (MsrA/B) is a surface exposed, immunogenic, vaccine candidate

Freda E.-C. Jen<sup>1</sup>, Evgeny A. Semchenko<sup>1</sup>, Christopher J. Day<sup>1</sup>, and Kate L. Seib<sup>1§</sup>, Michael P. Jennings<sup>1§\*</sup>

<sup>1</sup>Institute for Glycomics, Griffith University, Gold Coast, QLD, Australia

## Supplementary data

**Table S1. Primers used in this study.**

| Primer name         | Primer sequence 5'-3' *              |
|---------------------|--------------------------------------|
| 1291msrFor          | GCCGTCTGAAATGAAACACCGTACTTTCTTTTCCC  |
| 1291msrRev          | TTCAGACGGCTTATTTCACTTTGCCCTTCAACGCG  |
| msrexp_NdeIF        | AAAATCCATATGAAAGGGACCGCGACCGTGCCGCA  |
| msrexp_XhoIR        | CCCTGACTCGAGTTATTTCACTTTGCCCTTC      |
| pCTS32_Msr_AflIIFor | CTCGAGCTTAAGCCGGCGTTTCCTGTTTTTTC     |
| pCTS32_Msr_SmaIRev  | TGCGGCCCGGGTTATTTCACTTTGCCCTTCAACG   |
| pComP_Msr_NdeIFor   | ATCAAACATATGATGAAACACCGTACTTTCTTTTCC |
| pComP_Msr_NsiIRev   | TGCGGCATGCATTTATTTCACTTTGCCCTTCAACG  |

**Table S2. Data for individual and pooled mice sera immunised with MsrA/B-Alum.**

| <b>MsrA/B-Alum</b> | <b>ELISA titre vs MsrA/B</b> |              |              |             |            | <b>ELISA titre vs whole cells<sup>^</sup></b> |             |               | <b>SBA titre</b> |             | <b>OPA titre</b> |             |
|--------------------|------------------------------|--------------|--------------|-------------|------------|-----------------------------------------------|-------------|---------------|------------------|-------------|------------------|-------------|
| <b>Mouse</b>       | <b>IgG1</b>                  | <b>IgG2a</b> | <b>IgG2b</b> | <b>IgG3</b> | <b>IgM</b> | <b>WT</b>                                     | <b>Δmsr</b> | <b>Δmsr_C</b> | <b>Pre</b>       | <b>Post</b> | <b>Pre</b>       | <b>Post</b> |
| <b>1</b>           | 655,360                      | 200          | 800          | 200         | 12,800     | 128,000                                       | 2,000       | 512,000       | -                | -           | -                | -           |
| <b>2</b>           | 2,621,440                    | 200          | 3,200        | 200         | 51,200     | 256,000                                       | 2,000       | 512,000       | -                | -           | -                | -           |
| <b>3</b>           | 1,310,720                    | 200          | 800          | 200         | 6,400      | 64,000                                        | 2,000       | 256,000       | -                | -           | -                | -           |
| <b>4</b>           | 1,310,720                    | 200          | 1,600        | 200         | 6,400      | 512,000                                       | 2,000       | 1,024,000     | -                | -           | -                | -           |
| <b>5</b>           | 655,360                      | 200          | 1,600        | 200         | 3,200      | 56,000                                        | 2,000       | 512,000       | -                | -           | -                | -           |
| <b>6</b>           | 1,310,720                    | 200          | 200          | 200         | 3,200      | 128,000                                       | 2,000       | 512,000       | -                | -           | -                | -           |
| <b>7</b>           | 1,310,720                    | 200          | 800          | 200         | 3,200      | 128,000                                       | 2,000       | 256,000       | -                | -           | -                | -           |
| <b>8</b>           | 1,310,720                    | 200          | 6,400        | 200         | 12,800     | 512,000                                       | 2,000       | 1,024,000     | -                | -           | -                | -           |
| <b>9</b>           | 655,360                      | 200          | 400          | 200         | 51,200     | 128,000                                       | 2,000       | 512,000       | -                | -           | -                | -           |
| <b>10</b>          | 2,621,440                    | 200          | 200          | 200         | 3,200      | 128,000                                       | 2,000       | 512,000       | -                | -           | -                | -           |
| <b>GMT</b>         | 1,222,945                    | 200          | 919          | 200         | 8,445      | 155,496                                       | 2,000       | 512,000       | -                | -           | -                | -           |
| <b>pool</b>        |                              |              |              |             |            |                                               |             |               | <50              | <50         | <50              | <50         |

SBA titre; serum bactericidal titre (reciprocal of the lowest antibody dilution which induced more than 50% killing after 60 min). OPA titre, opsonophagocytic titre (reciprocal of the lowest antibody dilution which induced more than 50% killing after 90 min). GMT, geometric mean titre; -, not determined. <sup>^</sup> The titres of pre-immune sera against whole cell *N. gonorrhoeae* 1291 strains were  $\leq 200$ .

**Table S3. Data for individual and pooled mice sera immunised with MsrA/B-Freund's.**

| <b>MsrA/B-Freund's</b> | <b>ELISA titre vs MsrA/B</b> |              |              |             |            | <b>ELISA titre vs whole cells<sup>^</sup></b> |             |               | <b>SBA titre*</b> |             | <b>OPA titre*</b> |             | <b>MsrA/B-Me(O) binding inhibition</b> |             |
|------------------------|------------------------------|--------------|--------------|-------------|------------|-----------------------------------------------|-------------|---------------|-------------------|-------------|-------------------|-------------|----------------------------------------|-------------|
| <b>Mouse</b>           | <b>IgG1</b>                  | <b>IgG2a</b> | <b>IgG2b</b> | <b>IgG3</b> | <b>IgM</b> | <b>WT</b>                                     | <b>Δmsr</b> | <b>Δmsr_C</b> | <b>Pre</b>        | <b>Post</b> | <b>Pre</b>        | <b>Post</b> | <b>Pre</b>                             | <b>Post</b> |
| <b>1</b>               | 10,240,000                   | 400          | 51,200       | 25,600      | 12,800     | 320,000                                       | 2,000       | 640,000       | <50               | 50          | <100              | 200         | 20.5%                                  | 41.9%       |
| <b>2</b>               | 5,120,000                    | 800          | 25,600       | 6,400       | 12,800     | 320,000                                       | 2,000       | 640,000       | <50               | 50          | 100               | 200         | 4.6%                                   | 62.5%       |
| <b>3</b>               | 10,240,000                   | 400          | 25,600       | 6,400       | 6,400      | 320,000                                       | 2,000       | 640,000       | <50               | 100         | <100              | 200         | 5.7%                                   | 99.7%       |
| <b>4</b>               | 10,240,000                   | 800          | 25,600       | 12,800      | 12,800     | 320,000                                       | 2,000       | 640,000       | <50               | 50          | <100              | 200         | 9.0%                                   | 65.7%       |
| <b>5</b>               | 10,240,000                   | 800          | 12,800       | 6,400       | 6,400      | 80,000                                        | 2,000       | 160,000       | <50               | <50         | <100              | <100        | 6.2%                                   | 12.0%       |
| <b>6</b>               | 20,480,000                   | 400          | 12,800       | 1,600       | 6,400      | 40,000                                        | 2,000       | 160,000       | 50                | 200         | 100               | 800         | 3.2%                                   | 49.0%       |
| <b>7</b>               | 10,240,000                   | 200          | 12,800       | 6,400       | 12,800     | 160,000                                       | 2,000       | 320,000       | <50               | <50         | <100              | 100         | 1.1%                                   | 54.1%       |
| <b>8</b>               | 10,240,000                   | 400          | 25,600       | 12,800      | 6,400      | 40,000                                        | 2,000       | 80,000        | 50                | 100         | 100               | 400         | 6.5%                                   | 54.7%       |
| <b>9</b>               | 5,120,000                    | 200          | 12,800       | 800         | 12,800     | 640,000                                       | 2,000       | 1,280,000     | 50                | 200         | 100               | 400         | 17.2%                                  | 64.9%       |
| <b>10</b>              | 5,120,000                    | 400          | 6,400        | 400         | 6,400      | 320,000                                       | 2,000       | 640,000       | <50               | 50          | <100              | 100         | 0.9%                                   | 55.9%       |
| <b>GMT</b>             | 8914438                      | 429          | 18102        | 4525        | 9051       | 246754                                        | 2000        | 393966        | 50                | 84          | 55                | 200         |                                        |             |
| <b>Mean</b>            |                              |              |              |             |            |                                               |             |               |                   |             |                   |             | 7.5%                                   | 56.0%       |
| <b>pool</b>            |                              |              |              |             |            |                                               |             |               | <100              | 100         | <100              | 400         | 18.5%                                  | 67.9%       |

SBA titre; serum bactericidal titre (reciprocal of the lowest antibody dilution which induced more than 50% killing after 60 min). OPA titre, opsonophagocytic titre (reciprocal of the lowest antibody dilution which induced more than 50% killing after 90 min). GMT, geometric mean titre.

<sup>^</sup> The titres of pre-immune sera against whole cell *N. gonorrhoeae* 1291 strains was ≤200. \* When a final titre was not reached (i.e., <50 or <100) a value of the next 2-fold dilution (i.e., 25 or 50, respectively) was used to calculate the GMT.

| D0322            | EYAFSREYIDRLFKPGITVDVVSQEPFLSSADKTDGGCGWSPFTRPTDAKSVEYERDQPSFNMRHTEVRSHAADSRGLGHVPDGPDRDKAGGLRTCTINGASLKFIPLEQMADAAGTGALKGKGKVK | See |
|------------------|---------------------------------------------------------------------------------------------------------------------------------|-----|
| WHO_K            | .                                                                                                                               | .   |
| I291             | .                                                                                                                               | .   |
| MS-11            | .                                                                                                                               | E   |
| FA1090           | .                                                                                                                               | .   |
| 75/i-12          | .                                                                                                                               | .   |
| SRR3348270       | . Y . H .                                                                                                                       | S   |
| 999000027        | .                                                                                                                               | .   |
| 316739890000441  | .                                                                                                                               | E   |
| 08_590_00131     | .                                                                                                                               | .   |
| 11CFX_C_051      | K .                                                                                                                             | .   |
| SRR3360766       | .                                                                                                                               | .   |
| 316591EST_12_23  | .                                                                                                                               | .   |
| 05AZI_T_001      | .                                                                                                                               | .   |
| SRR3348334       | .                                                                                                                               | E   |
| 11CFX_C_043      | .                                                                                                                               | E   |
| 315121EST_12_26  | .                                                                                                                               | T   |
| 590_105          | R .                                                                                                                             | H.  |
| 12CFX_C_026      | .                                                                                                                               | .   |
| 31621IND_06_3583 | .                                                                                                                               | .   |
| SRR3336051       | .                                                                                                                               | .   |
| 08_590_00144     | .                                                                                                                               | E   |
| SRR3360328       | K .                                                                                                                             | .   |
| MJA_2011_03-09   | .                                                                                                                               | .   |
| 07AZI_T_019      | .                                                                                                                               | .   |
| D0347            | .                                                                                                                               | E   |
| SRR3360911       | .                                                                                                                               | .   |
| SRR3360841       | .                                                                                                                               | E   |
| 08_590_48        | .                                                                                                                               | .   |
| SRR3350164       | .                                                                                                                               | .   |
| SRR3357142       | .                                                                                                                               | .   |
| Ngs1_55          | .                                                                                                                               | .   |
| 13AZI_T_005      | .                                                                                                                               | .   |
| D0GK13           | .                                                                                                                               | .   |
| 999000083        | .                                                                                                                               | E   |
| SRR3361355       | .                                                                                                                               | .   |
| Nm MC58          | . Y . H .                                                                                                                       | .   |

**Figure S1. Conservation of gonococcal MsrA/B.**

An alignment of the 35 unique MsrA/B variants of *N. gonorrhoeae* is shown, with the consensus sequence at the top. Matches to the consensus sequence are indicated by dots. A representative strain for each variant is shown and the number of strains with that variant is given in brackets. The *N. meningitidis* MC58 MsrA/B sequence is also included. The predicted signal peptide is shown, and \* indicate catalytic residues identified in *N. meningitidis* MsrA/B.

## TMHMM result

[HELP](#) with output formats

---

```
# Ng1291_MsrA/B Length: 522
# Ng1291_MsrA/B Number of predicted TMHs: 0
# Ng1291_MsrA/B Exp number of AAs in TMHs: 0.651070000000000001
# Ng1291_MsrA/B Exp number, first 60 AAs: 0.61189
# Ng1291_MsrA/B Total prob of N-in: 0.03201
Ng1291_MsrA/B TMHMM2.0 outside 1 522
```

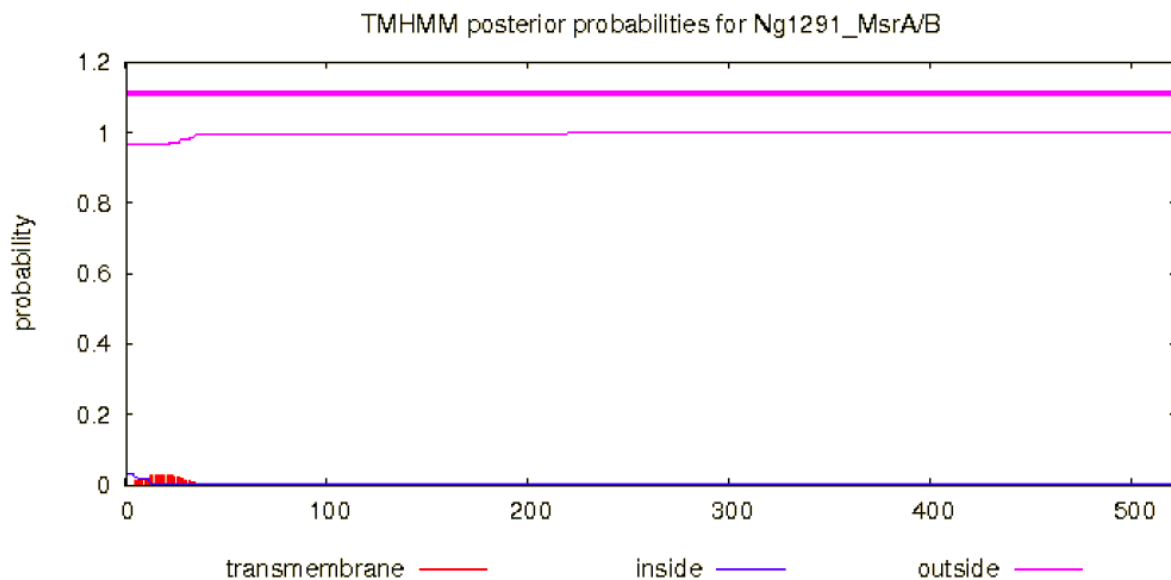

# [plot](#) in postscript, [script](#) for making the plot in gnuplot, [data](#) for plot

---

### Figure S2. Topology prediction of MsrA/B.

Topology prediction analysis using TMHMM (Krogh et al., 2001) indicates that MsrA/B does not have any transmembrane domains and that the whole protein is located outside of the membrane.

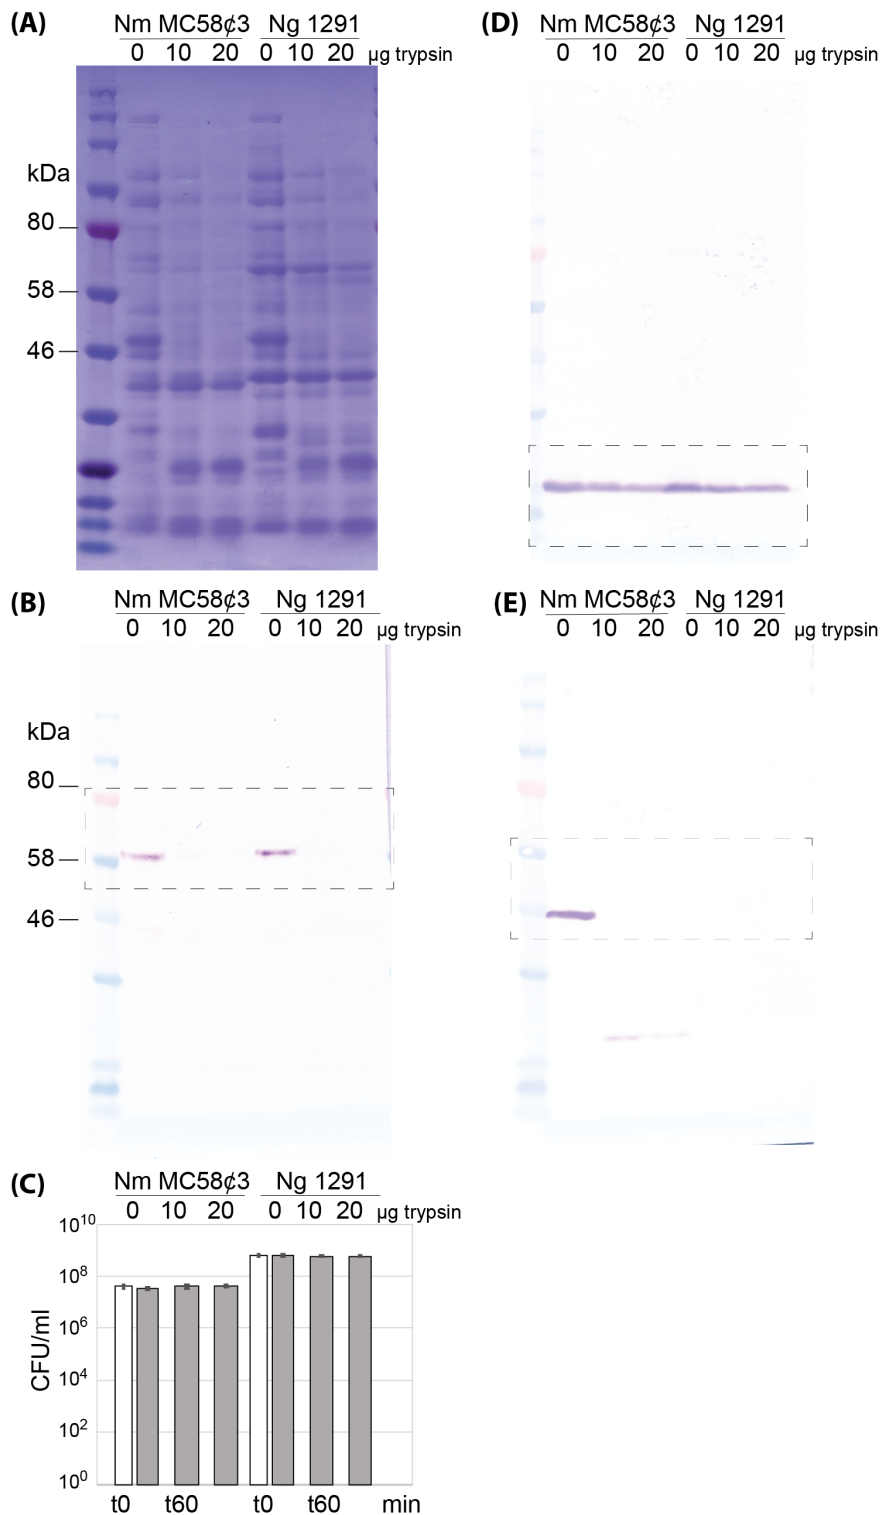

**Figure S3. Surface localisation of MsrA/B.**

**(A)** Coomassie stained SDS-PAGE and **(B)** Western blot analysis of trypsin treated (20  $\mu$ g, 10 $\mu$ g) and untreated (0  $\mu$ g) whole cell *N. gonorrhoeae* 1291 and *N. meningitidis* MC58 $\phi$ 3, probed with anti-MsrA/B antibodies. The region of the Western blot shown in Figure 1 is boxed. **(C)** CFU/ml determined from samples taken at time 0 (t0) and at 60 min (t60) for each sample are shown below the Western blot. No significant differences were seen in CFUs/ml at t0 vs. 60mins, as assessed by a two-tailed unpaired Student's *t*-test ( $p > 1.5$ ), indicating that no cell lysis occurred during the assay. **(D-E)** Western blot analysis of samples from (A-C), probed with **(D)** antibodies to the intracellular protein GNA2091, and **(E)** antibodies to the extracellular protein PorA.

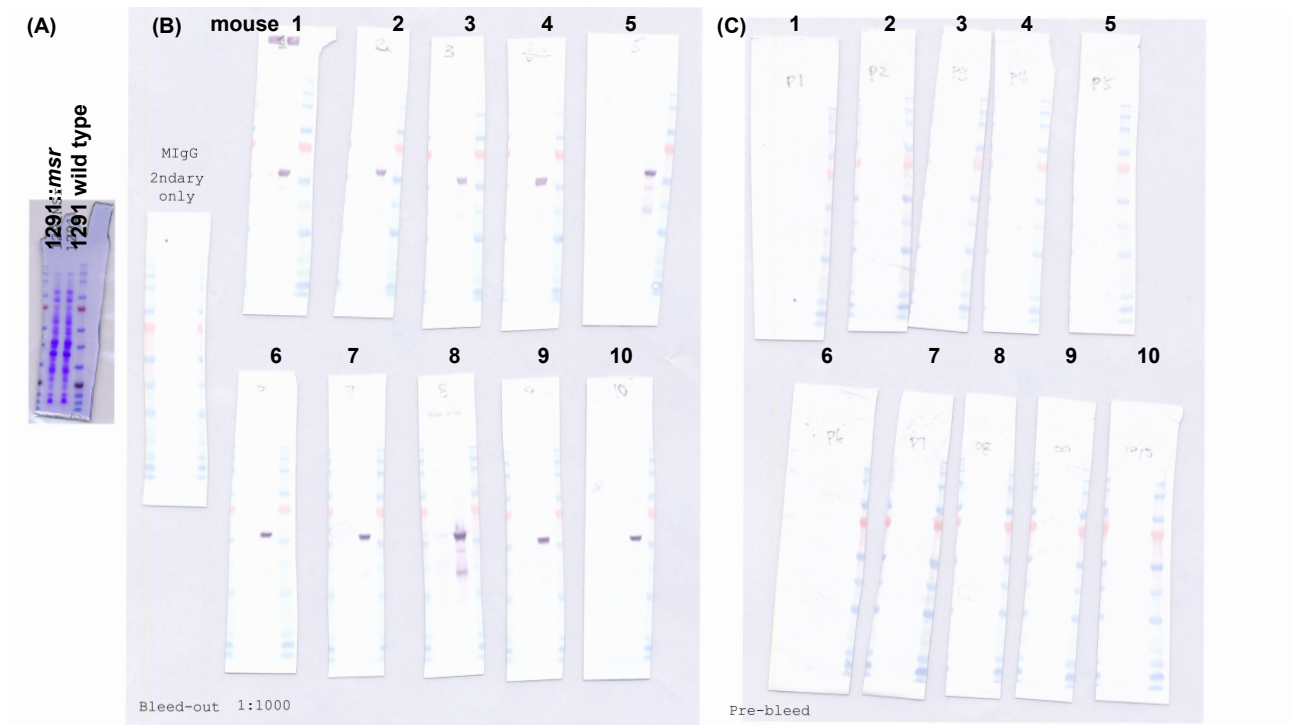

**Figure S4. Reactivity of mouse sera to MsrA/B.**

(A) Coomassie stained SDS-PAGE of *N. gonorrhoeae* 1291::msr and wild type whole cell lysates, and Western blot analysis of whole cell lysates probed with (B) anti-MsrA/B antibodies or (C) pre-immune sera from ten mice. There was no reactivity against MsrA/B in pre-immune sera, while an antibody response was generated by all mice that specifically recognizes MsrA/B in the wild-type strain but not the mutant strain.



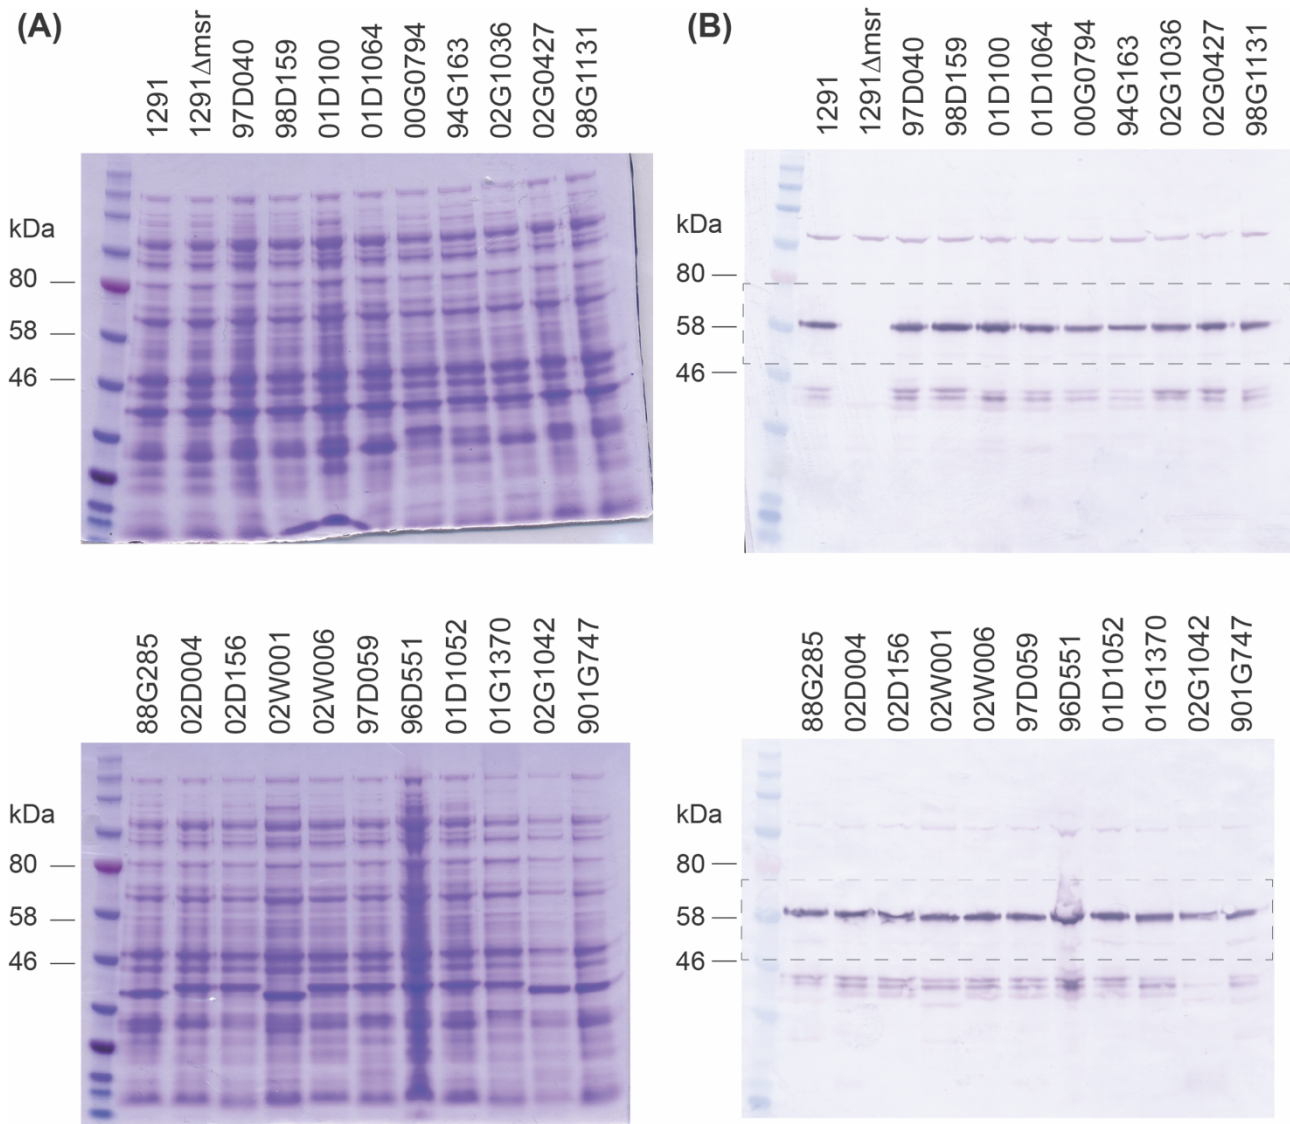

**Figure S5. Expression of MsrA/B in a panel of gonococcal strains.**

(A) Coomassie stains SDS-PAGE and (B) Western blot analysis of MsrA/B expression in a panel of *N. gonorrhoeae* strains, including the 1291 wild type and *msr::kan* mutant (1291 $\Delta$ msr), and twenty clinical isolates from mucosal and disseminated gonococcal infections. The region of the Western blot shown in Figure 3 is boxed.

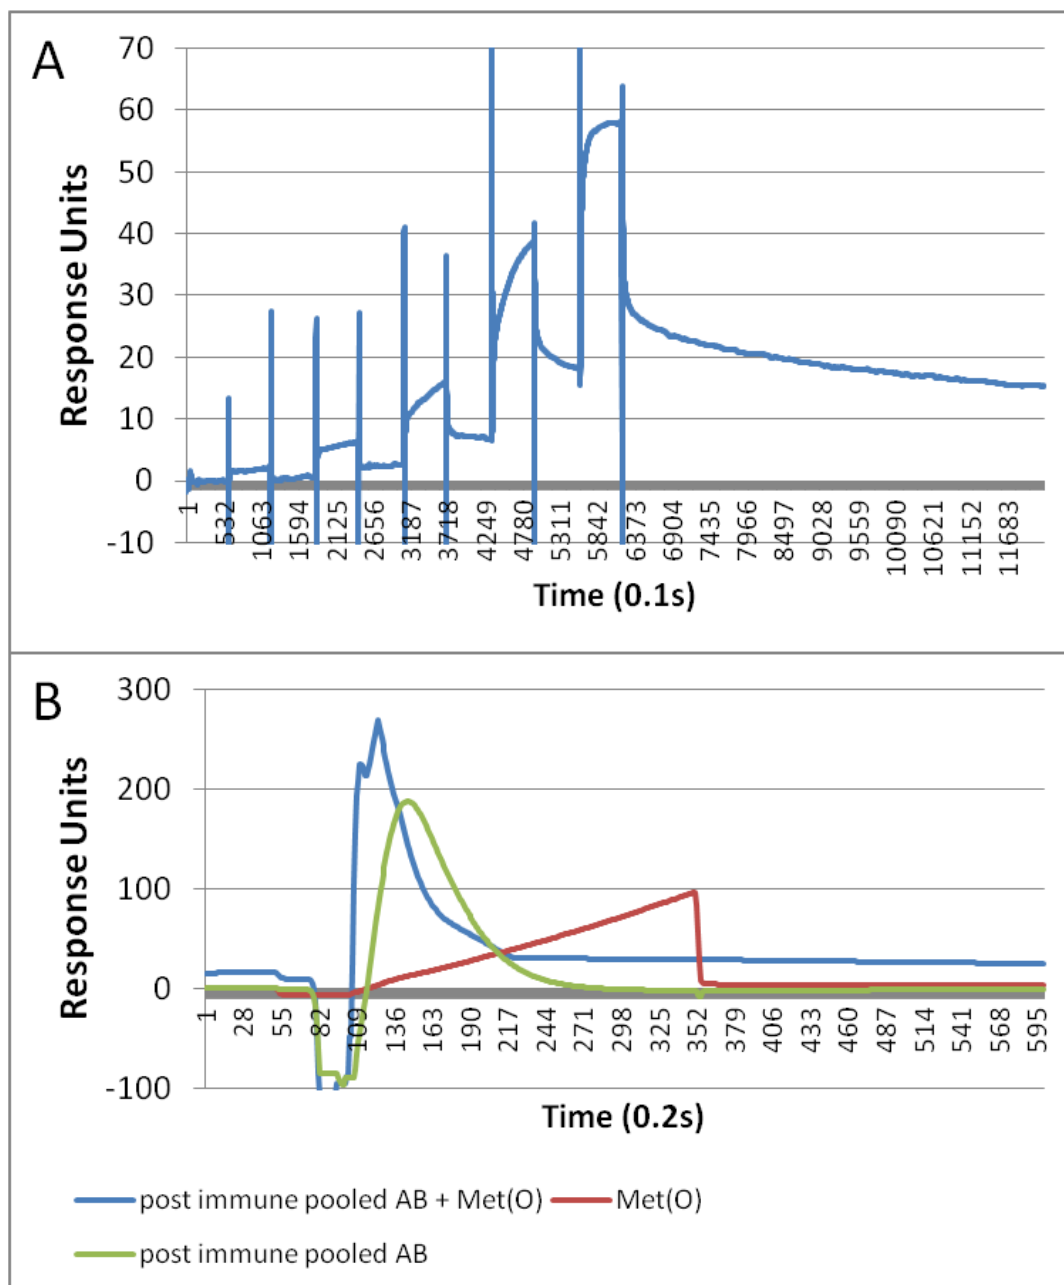

**Figure S6. Surface plasmon resonance (SPR) analysis of MsrA/B - Met(O) interaction.**

Representative sensorgrams from surface plasmon resonance analysis of recombinant MsrA/B binding to methionine sulfoxide (Met(O)). **(A)** Single cycle kinetics of Met(O) against MsrA/B. **(B)** Competition analysis of MsrA/B with pooled post immune serum (AB) demonstrating the direct competition between the pooled serum and Met(O).
